# Supplementary material for: Survival improvements in zoo-housed giraffes lead to surplus males: A long-term analysis of longevity and mortality in Japanese zoos
Source: Research Square preprint supplement (doi:10.21203/rs.3.rs-7858970/v1), 2025-10-15
Supplement: Supplementary file 1 [file af7cfd870ef26e0fc411cf2d.xlsx]

## Sheet: Sheet1
No	Sex	status	time	Birth_year
241	M	1	26.2356	1980	1980s
242	F	1	3	1980	1980s
243	M	1	12.0767	1980	1980s
244	F	1	16.3781	1980	1980s
245	M	1	13.7671	1980	1980s
246	F	1	18.4712	1980	1980s
248	F	1	30.211	1980	1980s
252	F	1	14.2137	1980	1980s
253	F	1	0.432877	1980	1980s
254	M	1	13.3534	1980	1980s
255	F	1	21.189	1980	1980s
256	M	1	0.254795	1980	1980s
257	M	1	0.0219178	1980	1980s
258	M	1	0.334247	1980	1980s
259	M	1	0	1980	1980s
1176	M	1	0.720548	1980	1980s
1177	F	1	8.39726	1980	1980s
1178	M	1	2.02192	1980	1980s
1184	F	1	0.00547945	1980	1980s
1185	F	1	8.28767	1980	1980s
1186	F	1	12.3233	1980	1980s
1381	M	1	0.00273973	1980	1980s
1382	M	1	2.4137	1980	1980s
262	M	1	13.9452	1981	1980s
263	M	1	0.00273973	1981	1980s
264	F	1	11.2027	1981	1980s
266	M	1	0.00821918	1981	1980s
267	M	1	3.03288	1981	1980s
268	F	1	0	1981	1980s
269	M	1	9.98904	1981	1980s
271	M	1	0	1981	1980s
272	M	1	17.9123	1981	1980s
273	F	1	0.391781	1981	1980s
274	M	1	13.663	1981	1980s
275	M	1	1.23562	1981	1980s
276	F	1	7.63562	1981	1980s
291	F	1	9.12055	1981	1980s
292	F	1	7.46301	1981	1980s
293	F	1	14.6548	1981	1980s
294	M	1	8.49863	1981	1980s
295	F	1	0	1981	1980s
297	F	1	28.4411	1981	1980s
299	F	1	0	1981	1980s
1187	F	1	14.8767	1981	1980s
1188	M	1	2.85479	1981	1980s
1189	M	1	0.210959	1981	1980s
1384	M	1	4.24932	1981	1980s
1385	F	1	2.76164	1981	1980s
1415	M	1	10.5863	1981	1980s
1416	F	1	1.34247	1981	1980s
304	M	1	0.276712	1982	1980s
305	F	1	0	1982	1980s
307	F	1	15.937	1982	1980s
308	F	1	9.45479	1982	1980s
309	F	1	0.0465753	1982	1980s
310	M	1	10.2411	1982	1980s
312	M	1	0.454795	1982	1980s
313	F	1	8.32877	1982	1980s
314	F	1	14.4548	1982	1980s
315	F	1	0	1982	1980s
316	M	1	11.6986	1982	1980s
317	M	1	0.00821918	1982	1980s
318	M	1	12.0575	1982	1980s
319	F	1	0.0109589	1982	1980s
320	M	1	0.0191781	1982	1980s
1191	M	1	1.9589	1982	1980s
1192	M	1	0	1982	1980s
1194	M	1	12.526	1982	1980s
1195	F	1	11.5452	1982	1980s
1196	F	1	26.4082	1982	1980s
1197	M	1	0	1982	1980s
1198	M	1	1.48767	1982	1980s
1199	M	1	0.30137	1982	1980s
1200	F	1	13.2	1982	1980s
1201	M	1	9.56986	1982	1980s
1202	M	1	0.0438356	1982	1980s
1386	M	1	8	1982	1980s
1387	M	1	10.3644	1982	1980s
1388	F	1	0.030137	1982	1980s
1389	M	1	1.27945	1982	1980s
1390	M	1	0.120548	1982	1980s
1417	M	1	0.652055	1982	1980s
1482	F	1	29.0932	1982	1980s
322	M	1	0	1983	1980s
323	M	1	10.9068	1983	1980s
325	F	1	4.00548	1983	1980s
327	F	1	2.53425	1983	1980s
328	M	1	2.52877	1983	1980s
329	F	1	1.31781	1983	1980s
330	M	1	16.9479	1983	1980s
331	F	1	8.4274	1983	1980s
332	F	1	8.7589	1983	1980s
334	M	1	15.1507	1983	1980s
335	F	1	0	1983	1980s
336	F	1	0.769863	1983	1980s
337	M	1	12.1342	1983	1980s
1203	F	1	2.65205	1983	1980s
1205	M	1	0	1983	1980s
1391	F	1	1.94521	1983	1980s
1392	M	1	6.29041	1983	1980s
1393	F	1	0.00273973	1983	1980s
1418	F	1	0.00547945	1983	1980s
1419	M	1	6.45753	1983	1980s
1453	M	1	21.5863	1983	1980s
1455	F	1	24.3973	1983	1980s
339	F	1	10.9096	1984	1980s
340	F	1	0	1984	1980s
341	F	1	19.0575	1984	1980s
342	F	1	0	1984	1980s
344	M	1	6.20548	1984	1980s
345	F	1	13.3041	1984	1980s
346	M	1	6.73973	1984	1980s
347	M	1	11.8877	1984	1980s
350	F	1	13.5644	1984	1980s
351	M	1	0	1984	1980s
352	M	1	11.4027	1984	1980s
353	F	1	4.26027	1984	1980s
354	M	1	3.47945	1984	1980s
355	F	1	0.134247	1984	1980s
356	F	1	10.7534	1984	1980s
357	F	1	27.5973	1984	1980s
1206	F	1	0.0328767	1984	1980s
1208	M	1	0.00273973	1984	1980s
1209	F	1	2.68219	1984	1980s
1210	F	1	5.70411	1984	1980s
1211	F	1	0.293151	1984	1980s
1212	F	1	0.30411	1984	1980s
1213	M	1	0.205479	1984	1980s
1219	F	1	0.191781	1984	1980s
1220	M	1	4.42192	1984	1980s
1421	F	1	0.564384	1984	1980s
1456	M	1	15.0055	1984	1980s
1483	M	1	23.8	1984	1980s
359	F	1	24.4274	1985	1980s
360	M	1	0.19726	1985	1980s
361	F	1	3.45479	1985	1980s
362	F	1	12.5836	1985	1980s
364	F	1	0	1985	1980s
365	M	1	0.468493	1985	1980s
366	M	1	5.57808	1985	1980s
367	F	1	2.08493	1985	1980s
368	M	1	0.586301	1985	1980s
369	M	1	4.73699	1985	1980s
370	M	1	1.48493	1985	1980s
372	M	1	3.33151	1985	1980s
373	M	1	2.33425	1985	1980s
374	F	1	5.07671	1985	1980s
375	M	1	0	1985	1980s
376	F	1	13.8603	1985	1980s
377	F	1	0.578082	1985	1980s
378	M	1	18.5205	1985	1980s
379	M	1	2.44932	1985	1980s
380	F	1	1.93151	1985	1980s
381	M	1	0	1985	1980s
382	M	1	2.04658	1985	1980s
383	F	1	24.8356	1985	1980s
1221	M	1	2.90959	1985	1980s
1222	M	1	19.2658	1985	1980s
1223	M	1	0.0986301	1985	1980s
1225	F	1	6.64384	1985	1980s
1226	M	1	2.35616	1985	1980s
1227	F	1	2.2	1985	1980s
1229	F	1	4.00822	1985	1980s
1394	F	1	4.20274	1985	1980s
1422	F	1	0.178082	1985	1980s
1423	M	1	17.2329	1985	1980s
1457	M	1	3.55342	1985	1980s
384	M	1	0.00821918	1986	1980s
385	M	1	12.3863	1986	1980s
386	M	1	2.69315	1986	1980s
387	M	1	1.11233	1986	1980s
389	M	1	12.0493	1986	1980s
390	M	1	11.7534	1986	1980s
391	M	1	3.81644	1986	1980s
392	F	1	5.65205	1986	1980s
393	F	1	4.5863	1986	1980s
394	F	1	0.00273973	1986	1980s
395	F	1	2.96438	1986	1980s
396	F	1	1.6411	1986	1980s
397	M	1	16.4767	1986	1980s
398	F	1	10.0329	1986	1980s
399	M	1	10.9726	1986	1980s
400	M	1	0.0136986	1986	1980s
401	F	1	0.361644	1986	1980s
1230	F	1	4.81096	1986	1980s
1231	M	1	3.65753	1986	1980s
1232	M	1	0.00821918	1986	1980s
1395	M	1	7.86575	1986	1980s
1396	F	1	19.6603	1986	1980s
1424	F	1	3.45753	1986	1980s
402	M	1	1.12603	1987	1980s
404	F	1	1.39452	1987	1980s
405	F	1	22.274	1987	1980s
407	F	1	12.2192	1987	1980s
408	F	1	8.79726	1987	1980s
410	F	1	13.6055	1987	1980s
411	F	1	11.4438	1987	1980s
412	M	1	1.00822	1987	1980s
413	M	1	5.54795	1987	1980s
414	F	1	0	1987	1980s
415	M	1	0.539726	1987	1980s
416	M	1	2.95068	1987	1980s
417	M	1	0.0109589	1987	1980s
418	F	1	0.00273973	1987	1980s
419	F	1	13.5589	1987	1980s
422	F	1	15.3452	1987	1980s
423	F	1	3.54795	1987	1980s
424	M	1	0.4	1987	1980s
425	M	1	0.00273973	1987	1980s
426	M	1	0.00821918	1987	1980s
427	F	1	14.5205	1987	1980s
428	M	1	3.31507	1987	1980s
429	F	1	0.150685	1987	1980s
1236	M	1	15.2932	1987	1980s
1237	F	1	2.56712	1987	1980s
1238	M	1	0.279452	1987	1980s
1239	M	1	19.1863	1987	1980s
1240	M	1	0.364384	1987	1980s
1241	M	1	1.01918	1987	1980s
1242	F	1	0.30411	1987	1980s
1397	M	1	9.37808	1987	1980s
1425	M	1	1.46027	1987	1980s
1427	F	1	0	1987	1980s
430	M	1	15.9397	1988	1980s
431	M	1	0.726027	1988	1980s
432	M	1	0	1988	1980s
433	F	1	14.7753	1988	1980s
434	M	1	1.45479	1988	1980s
435	F	1	6.88219	1988	1980s
436	M	1	4.81918	1988	1980s
437	M	1	2.23014	1988	1980s
438	F	1	0.00273973	1988	1980s
439	F	1	0	1988	1980s
440	F	1	22.2274	1988	1980s
441	M	1	0.0109589	1988	1980s
442	F	1	1.80274	1988	1980s
443	F	1	23.2685	1988	1980s
444	F	1	0	1988	1980s
445	M	1	5.92055	1988	1980s
446	F	1	8.92877	1988	1980s
447	F	1	6.69315	1988	1980s
448	M	1	20.0466	1988	1980s
449	F	1	1.16164	1988	1980s
450	M	1	1.53425	1988	1980s
452	F	1	0.468493	1988	1980s
453	F	1	21.4219	1988	1980s
454	M	1	19.2411	1988	1980s
455	M	1	1.57534	1988	1980s
456	F	1	1.46027	1988	1980s
457	M	1	0.0136986	1988	1980s
458	F	1	20.2192	1988	1980s
1243	M	1	1.96712	1988	1980s
1244	M	1	0.0520548	1988	1980s
1245	F	1	2.72877	1988	1980s
1246	M	1	0	1988	1980s
1247	M	1	9.39178	1988	1980s
1250	F	1	12.726	1988	1980s
1398	F	1	21.4712	1988	1980s
1399	F	1	0.0794521	1988	1980s
1428	M	1	0.912329	1988	1980s
1488	F	1	32.9671	1988	1980s
459	F	1	0.128767	1989	1980s
460	M	1	21.8932	1989	1980s
461	M	1	0.0246575	1989	1980s
462	F	1	10.474	1989	1980s
463	M	1	1.30137	1989	1980s
464	F	1	1.29863	1989	1980s
465	F	1	5.37808	1989	1980s
466	M	1	1.30685	1989	1980s
467	M	1	0	1989	1980s
469	M	1	6.73973	1989	1980s
470	F	1	0.0109589	1989	1980s
471	F	1	0.00547945	1989	1980s
473	M	1	2.12603	1989	1980s
474	F	1	0.29589	1989	1980s
475	M	1	6.3726	1989	1980s
476	M	1	0.542466	1989	1980s
477	F	1	18.4493	1989	1980s
479	M	1	7.72329	1989	1980s
480	F	1	7.20274	1989	1980s
481	M	1	0	1989	1980s
482	F	1	0.230137	1989	1980s
483	F	1	12.7973	1989	1980s
485	F	1	0.169863	1989	1980s
486	M	1	2.96438	1989	1980s
487	M	1	0.109589	1989	1980s
488	M	1	0.945205	1989	1980s
1251	F	1	0.361644	1989	1980s
1253	M	1	3.92603	1989	1980s
1254	F	1	4.9863	1989	1980s
1255	M	1	6.6	1989	1980s
1256	F	1	0	1989	1980s
1257	F	1	2.56438	1989	1980s
1258	M	1	13.2849	1989	1980s
1260	F	1	0.0876712	1989	1980s
1458	F	1	0.479452	1989	1980s
490	F	1	17.9041	1990	1990s
491	M	1	2.44384	1990	1990s
492	M	1	3.23836	1990	1990s
493	F	1	4.4411	1990	1990s
494	M	1	0.00273973	1990	1990s
495	F	1	7.78082	1990	1990s
496	F	1	13.0466	1990	1990s
497	F	1	0.473973	1990	1990s
498	F	1	12.9342	1990	1990s
499	M	1	4.27945	1990	1990s
500	F	1	0.0465753	1990	1990s
502	M	1	0.00273973	1990	1990s
503	M	1	6.6	1990	1990s
504	M	1	18.7616	1990	1990s
505	M	1	13.5562	1990	1990s
506	M	1	22.2356	1990	1990s
507	M	1	21.8082	1990	1990s
508	M	1	6.19726	1990	1990s
510	F	1	3.92877	1990	1990s
511	F	1	0	1990	1990s
512	F	1	0	1990	1990s
513	F	1	0.158904	1990	1990s
516	F	1	15.4301	1990	1990s
1261	F	1	0.0191781	1990	1990s
1262	M	1	1.68767	1990	1990s
1263	M	1	6.68767	1990	1990s
1265	F	1	12.1616	1990	1990s
1400	M	1	7.98082	1990	1990s
1430	F	1	0.0164384	1990	1990s
1459	F	1	0	1990	1990s
517	M	1	0.0219178	1991	1990s
518	M	1	5.13425	1991	1990s
519	M	1	5.98904	1991	1990s
520	F	1	24.8411	1991	1990s
521	M	1	27.0192	1991	1990s
522	F	1	6.30685	1991	1990s
524	M	1	15.7315	1991	1990s
525	F	1	14.4986	1991	1990s
526	F	1	0.0109589	1991	1990s
527	M	1	0	1991	1990s
528	F	1	17.2521	1991	1990s
529	M	1	4.92329	1991	1990s
531	M	1	0.454795	1991	1990s
532	F	1	6.33973	1991	1990s
533	F	1	15.1671	1991	1990s
534	F	1	1.03014	1991	1990s
535	F	1	27.3014	1991	1990s
536	F	1	10.5671	1991	1990s
1266	M	1	0.00547945	1991	1990s
1267	F	1	0.745205	1991	1990s
1268	M	1	10.9014	1991	1990s
1269	F	1	19.0685	1991	1990s
1270	F	1	0.257534	1991	1990s
1271	F	1	17.8603	1991	1990s
1272	F	1	4.64658	1991	1990s
1273	F	1	6.63014	1991	1990s
1274	F	1	0.00273973	1991	1990s
1431	F	1	0.235616	1991	1990s
537	M	1	0.0164384	1992	1990s
538	M	1	0.865753	1992	1990s
539	F	1	22.674	1992	1990s
540	M	1	0	1992	1990s
541	F	1	0.00547945	1992	1990s
542	M	1	15.4493	1992	1990s
544	F	1	0	1992	1990s
545	M	1	2.66849	1992	1990s
546	F	1	0.00547945	1992	1990s
547	F	1	1.23288	1992	1990s
548	F	1	15.2301	1992	1990s
549	M	1	0	1992	1990s
550	F	1	0	1992	1990s
551	F	1	28.1425	1992	1990s
552	F	1	16.6329	1992	1990s
556	M	1	4.69315	1992	1990s
558	F	1	1.78356	1992	1990s
1275	F	1	0.0410959	1992	1990s
1276	F	1	1.64658	1992	1990s
1277	F	1	0.00547945	1992	1990s
1278	M	1	8.69315	1992	1990s
1279	F	1	1.11781	1992	1990s
1280	F	1	0.473973	1992	1990s
1281	M	1	1.04658	1992	1990s
1401	M	1	0	1992	1990s
1432	M	1	0	1992	1990s
1461	F	1	13.3233	1992	1990s
560	F	1	21.9397	1993	1990s
561	M	1	18.3096	1993	1990s
562	M	1	6.78356	1993	1990s
563	M	1	0.246575	1993	1990s
564	M	1	0.0109589	1993	1990s
565	M	1	18.6685	1993	1990s
566	M	1	0	1993	1990s
567	F	1	17.8164	1993	1990s
568	M	1	0.509589	1993	1990s
569	F	1	1.21918	1993	1990s
570	F	1	4.47945	1993	1990s
571	F	1	0.106849	1993	1990s
572	F	1	17.7945	1993	1990s
573	M	1	11.5726	1993	1990s
574	F	1	5.01096	1993	1990s
576	F	1	0.00547945	1993	1990s
577	M	1	2.40274	1993	1990s
578	M	1	5.37534	1993	1990s
579	M	1	0.616438	1993	1990s
580	F	1	0	1993	1990s
581	M	1	0.0164384	1993	1990s
1282	M	1	19.7123	1993	1990s
1283	M	1	0.00547945	1993	1990s
1284	M	1	0.00273973	1993	1990s
1285	M	1	0.00547945	1993	1990s
1434	F	1	0.00821918	1993	1990s
1435	F	1	0.0109589	1993	1990s
1436	M	1	0	1993	1990s
1462	M	1	0.00547945	1993	1990s
582	F	1	1.93425	1994	1990s
583	F	1	0.0356164	1994	1990s
584	M	1	9.01918	1994	1990s
585	M	1	0.0273973	1994	1990s
586	F	1	0.178082	1994	1990s
587	M	0	29.8027	1994	1990s
588	M	1	0.0520548	1994	1990s
589	F	1	15.4767	1994	1990s
590	F	1	0	1994	1990s
591	F	1	11.5014	1994	1990s
592	F	1	0.884932	1994	1990s
593	F	1	0	1994	1990s
594	F	1	9.36164	1994	1990s
595	F	1	2.91233	1994	1990s
596	M	1	5.87397	1994	1990s
597	F	1	15.8904	1994	1990s
598	M	1	0.0109589	1994	1990s
600	F	1	0.00547945	1994	1990s
601	F	1	0	1994	1990s
602	M	1	3.25753	1994	1990s
603	F	1	1.08767	1994	1990s
605	F	1	0	1994	1990s
606	F	1	5.29041	1994	1990s
609	M	1	0	1994	1990s
610	M	1	0	1994	1990s
611	M	1	4.05479	1994	1990s
1288	F	1	0.830137	1994	1990s
1289	F	1	22.4411	1994	1990s
1290	M	1	13.9808	1994	1990s
1291	M	1	0	1994	1990s
1292	F	1	8.17534	1994	1990s
1293	M	1	12.6877	1994	1990s
1463	M	1	5.43562	1994	1990s
1464	M	1	6.36438	1994	1990s
1473	M	1	12.6548	1994	1990s
612	M	1	0.139726	1995	1990s
613	F	1	15.9096	1995	1990s
614	M	1	0.0219178	1995	1990s
615	M	1	15.4466	1995	1990s
616	F	1	0	1995	1990s
617	F	1	4.49315	1995	1990s
618	M	1	19.7151	1995	1990s
619	F	1	10.3699	1995	1990s
620	F	1	17.5288	1995	1990s
621	M	1	5.3589	1995	1990s
622	M	1	0.991781	1995	1990s
623	F	1	0	1995	1990s
624	F	1	24.5315	1995	1990s
625	M	1	1.05753	1995	1990s
626	M	1	11.5123	1995	1990s
627	M	1	2.52055	1995	1990s
628	M	1	0	1995	1990s
629	F	1	27.3425	1995	1990s
630	F	1	6.05753	1995	1990s
631	M	1	2.95068	1995	1990s
632	M	1	4.76986	1995	1990s
657	M	1	18.5534	1995	1990s
658	F	1	8.47123	1995	1990s
660	M	1	8.53151	1995	1990s
709	F	1	15.7014	1995	1990s
1294	F	1	16.3233	1995	1990s
1295	M	1	8.63836	1995	1990s
1296	F	1	24.9397	1995	1990s
1297	F	1	6.51233	1995	1990s
1306	M	1	21.674	1995	1990s
1437	M	1	1.27123	1995	1990s
1484	F	1	18.6438	1995	1990s
633	M	1	1.01096	1996	1990s
634	F	1	0.00547945	1996	1990s
635	F	1	0	1996	1990s
636	F	1	4.06849	1996	1990s
637	F	1	5.68767	1996	1990s
638	F	1	5.05205	1996	1990s
639	F	1	0.0821918	1996	1990s
640	F	1	0.446575	1996	1990s
641	M	1	0	1996	1990s
642	M	1	19.3836	1996	1990s
643	F	1	6.64384	1996	1990s
644	F	1	1.18904	1996	1990s
645	M	1	5.23562	1996	1990s
646	F	1	0.00273973	1996	1990s
647	M	1	0.241096	1996	1990s
648	M	1	11.1973	1996	1990s
649	M	1	0.00547945	1996	1990s
650	F	1	12.4055	1996	1990s
651	F	1	0.0356164	1996	1990s
652	M	1	15.5644	1996	1990s
653	F	1	24.8822	1996	1990s
654	M	1	8.73151	1996	1990s
655	F	1	24.4192	1996	1990s
659	F	1	14.4986	1996	1990s
675	M	1	0.216438	1996	1990s
686	F	1	2.61644	1996	1990s
1298	M	1	6.86027	1996	1990s
1299	M	1	0.00821918	1996	1990s
1300	F	1	0.00821918	1996	1990s
1301	M	1	0.254795	1996	1990s
1308	M	1	13.6904	1996	1990s
1438	F	1	0	1996	1990s
1465	M	1	5.74521	1996	1990s
1466	F	1	3.72603	1996	1990s
1470	M	1	2.85205	1996	1990s
1489	F	0	27.3233	1996	1990s
656	F	1	8.86575	1997	1990s
661	M	1	21.0904	1997	1990s
662	M	1	8.6411	1997	1990s
663	F	1	15.6959	1997	1990s
664	M	1	0.421918	1997	1990s
665	F	1	6.36438	1997	1990s
666	M	1	16.5973	1997	1990s
667	M	1	0	1997	1990s
668	F	1	24.3753	1997	1990s
669	M	1	2.8411	1997	1990s
670	F	1	3.35342	1997	1990s
671	M	1	7.26301	1997	1990s
672	M	1	2.34795	1997	1990s
673	M	1	0.216438	1997	1990s
674	M	1	0.00547945	1997	1990s
695	M	1	19.8904	1997	1990s
1302	M	1	7.56438	1997	1990s
1303	F	1	1.29315	1997	1990s
1304	F	1	17.4247	1997	1990s
1305	M	1	14.3096	1997	1990s
1468	F	1	17.5589	1997	1990s
1469	F	1	18.1753	1997	1990s
676	F	1	0.00273973	1998	1990s
677	F	1	14.7479	1998	1990s
678	M	1	17.3479	1998	1990s
679	F	1	21.3836	1998	1990s
680	F	1	10.526	1998	1990s
681	M	1	7.7863	1998	1990s
682	F	1	19.2082	1998	1990s
683	F	1	0.189041	1998	1990s
684	M	1	0.00547945	1998	1990s
685	M	1	6.58356	1998	1990s
687	F	0	25.9507	1998	1990s
688	F	1	11.4548	1998	1990s
694	F	1	16.7753	1998	1990s
696	F	1	18.2959	1998	1990s
698	M	1	0	1998	1990s
703	M	1	4.08219	1998	1990s
705	F	1	5.46849	1998	1990s
1307	M	1	2.52055	1998	1990s
1309	F	1	0.0246575	1998	1990s
1471	F	1	0.00547945	1998	1990s
1472	F	1	1.10411	1998	1990s
1485	F	0	25.8192	1998	1990s
689	M	1	17.5452	1999	1990s
690	M	1	0.00273973	1999	1990s
691	F	1	0.0219178	1999	1990s
692	M	1	1.00822	1999	1990s
693	F	1	0.0383562	1999	1990s
697	M	1	7.17808	1999	1990s
699	M	1	19.8685	1999	1990s
700	F	1	17.4356	1999	1990s
701	F	1	22.726	1999	1990s
702	F	1	1.13425	1999	1990s
704	M	1	3.10411	1999	1990s
706	M	1	0.263014	1999	1990s
1311	F	1	11.9781	1999	1990s
1312	F	1	1.80274	1999	1990s
1350	M	1	0.0219178	1999	1990s
1474	F	1	5.39452	1999	1990s
1475	M	1	4.60274	1999	1990s
707	M	1	3.21644	2000	2000s
708	M	1	0.00547945	2000	2000s
711	M	1	20.1644	2000	2000s
712	M	1	12.6082	2000	2000s
713	M	1	2.61096	2000	2000s
714	M	1	5.14521	2000	2000s
715	F	0	23.4493	2000	2000s
716	F	1	0	2000	2000s
717	F	1	12.8521	2000	2000s
718	M	1	11.0603	2000	2000s
719	M	1	0.0191781	2000	2000s
721	F	1	0	2000	2000s
1313	M	1	0.0109589	2000	2000s
1314	M	1	0.00821918	2000	2000s
1315	M	1	0.0356164	2000	2000s
1316	F	1	1.51233	2000	2000s
1317	F	1	14.211	2000	2000s
1477	F	1	3.22192	2000	2000s
1478	M	1	0	2000	2000s
1486	F	1	7.50411	2000	2000s
722	M	1	3.2	2001	2000s
723	M	1	10.0685	2001	2000s
724	F	1	14.8219	2001	2000s
725	F	0	22.7863	2001	2000s
726	F	1	16.3288	2001	2000s
727	M	0	22.7178	2001	2000s
728	F	1	12.4301	2001	2000s
729	M	1	2.93699	2001	2000s
730	F	1	6.75068	2001	2000s
731	F	1	19.9068	2001	2000s
732	M	1	9.52055	2001	2000s
733	M	1	0.830137	2001	2000s
735	F	1	0.257534	2001	2000s
751	F	0	22.6329	2001	2000s
1318	F	1	14.8466	2001	2000s
1319	F	1	1.87945	2001	2000s
1320	F	1	12.5151	2001	2000s
1321	M	1	0.150685	2001	2000s
1322	M	1	8.05479	2001	2000s
1480	M	1	7.08767	2001	2000s
736	M	1	0.0410959	2002	2000s
737	M	1	5.98356	2002	2000s
738	F	1	20.1671	2002	2000s
739	F	1	11.1014	2002	2000s
740	F	1	15.6603	2002	2000s
741	F	1	5.48767	2002	2000s
742	M	1	0.879452	2002	2000s
743	F	1	13.4904	2002	2000s
744	F	1	16.5068	2002	2000s
745	M	1	4.4	2002	2000s
746	F	1	13.3068	2002	2000s
747	F	1	0	2002	2000s
748	M	1	1.23562	2002	2000s
749	M	1	13.3753	2002	2000s
750	M	1	0.232877	2002	2000s
1323	F	1	0.961644	2002	2000s
1324	M	1	18.4164	2002	2000s
1325	M	1	0.00547945	2002	2000s
1479	F	1	5.71233	2002	2000s
752	M	1	0.882192	2003	2000s
753	F	1	0.00273973	2003	2000s
754	F	1	7.95616	2003	2000s
755	M	1	0.254795	2003	2000s
756	F	1	0.0109589	2003	2000s
757	M	1	0.0219178	2003	2000s
758	F	1	0.00547945	2003	2000s
759	F	1	0.0712329	2003	2000s
760	F	0	20.5151	2003	2000s
761	M	1	0.0465753	2003	2000s
762	M	1	7.49041	2003	2000s
763	F	0	20.474	2003	2000s
764	F	1	12.1151	2003	2000s
765	M	0	20.2329	2003	2000s
766	M	1	1.40274	2003	2000s
1326	F	1	11.9644	2003	2000s
1327	F	1	4.59726	2003	2000s
1328	F	1	0.00547945	2003	2000s
1329	M	1	2.63836	2003	2000s
1487	M	1	6.12055	2003	2000s
767	F	1	0.0109589	2004	2000s
768	M	0	19.9205	2004	2000s
769	F	1	17.1918	2004	2000s
770	M	1	0	2004	2000s
771	M	1	0.479452	2004	2000s
772	F	1	0.00547945	2004	2000s
773	F	1	12.0466	2004	2000s
774	F	1	18.7589	2004	2000s
775	M	1	10.5726	2004	2000s
776	F	1	1.51507	2004	2000s
777	F	1	9.1863	2004	2000s
778	F	1	0.0328767	2004	2000s
779	M	1	0.315068	2004	2000s
780	M	1	17.9479	2004	2000s
781	F	0	19.0849	2004	2000s
1330	M	1	0.00547945	2004	2000s
1331	M	1	11.7178	2004	2000s
1332	M	1	0.00273973	2004	2000s
1333	F	1	1.69315	2004	2000s
1334	F	1	11.0164	2004	2000s
1481	F	1	14.989	2004	2000s
782	F	1	0.0136986	2005	2000s
783	F	1	0	2005	2000s
784	F	1	9.30137	2005	2000s
785	F	1	0.0136986	2005	2000s
786	F	0	18.7233	2005	2000s
787	M	0	18.6959	2005	2000s
788	M	1	0.030137	2005	2000s
789	M	1	11.2658	2005	2000s
790	F	1	0.00273973	2005	2000s
791	M	0	18.263	2005	2000s
792	F	1	0.00273973	2005	2000s
793	F	1	10.7753	2005	2000s
794	F	1	14.4082	2005	2000s
795	F	1	0.205479	2005	2000s
796	M	0	18.0137	2005	2000s
1335	M	1	8.05205	2005	2000s
1336	M	1	0.438356	2005	2000s
1337	M	1	4.48767	2005	2000s
1338	F	1	2.08493	2005	2000s
797	F	0	17.8822	2006	2000s
798	F	0	17.8384	2006	2000s
799	M	1	3.65479	2006	2000s
800	F	1	0.0109589	2006	2000s
801	M	1	0.00273973	2006	2000s
802	M	1	0.0109589	2006	2000s
803	M	1	0.00547945	2006	2000s
804	F	1	15.6247	2006	2000s
805	M	1	9.63288	2006	2000s
806	M	1	0.00547945	2006	2000s
807	M	1	0.0986301	2006	2000s
1339	M	1	0	2006	2000s
808	F	0	16.7205	2007	2000s
809	F	1	8.5863	2007	2000s
810	M	1	0.687671	2007	2000s
811	M	1	4.66027	2007	2000s
812	M	1	2.41918	2007	2000s
813	M	1	1.44384	2007	2000s
814	M	1	15.211	2007	2000s
815	F	1	0.419178	2007	2000s
816	M	1	9.92603	2007	2000s
817	M	0	16.4521	2007	2000s
818	M	1	5.51507	2007	2000s
819	F	1	2.13699	2007	2000s
820	F	1	6.32055	2007	2000s
821	F	0	16.2466	2007	2000s
822	F	1	0	2007	2000s
823	M	1	0.0191781	2007	2000s
1340	M	1	0.00547945	2007	2000s
1341	M	1	0.983562	2007	2000s
1342	M	1	0	2007	2000s
1343	F	1	11.2959	2007	2000s
1344	M	1	0	2007	2000s
824	M	1	1.3863	2008	2000s
825	M	1	1.38082	2008	2000s
826	M	1	0	2008	2000s
827	F	1	0.00547945	2008	2000s
828	F	0	15.8384	2008	2000s
829	M	1	0.0136986	2008	2000s
830	F	1	8	2008	2000s
831	M	1	1.47123	2008	2000s
832	F	1	9.47397	2008	2000s
833	F	1	0.279452	2008	2000s
834	F	1	3.70685	2008	2000s
835	M	1	6.66849	2008	2000s
836	M	1	1.1726	2008	2000s
861	M	0	15.8548	2008	2000s
1345	M	1	9.23562	2008	2000s
1346	F	1	0	2008	2000s
837	M	1	0.0246575	2009	2000s
838	F	1	0.731507	2009	2000s
839	F	1	12.2904	2009	2000s
840	M	0	14.3973	2009	2000s
841	M	1	0.00547945	2009	2000s
842	F	0	14.3014	2009	2000s
843	M	0	14.211	2009	2000s
844	F	0	14.1534	2009	2000s
845	M	1	0.276712	2009	2000s
846	M	1	13.8493	2009	2000s
847	M	0	14.0274	2009	2000s
862	M	1	13.0603	2009	2000s
864	F	1	3.49041	2009	2000s
881	M	1	4.82192	2009	2000s
1347	M	1	1.58904	2009	2000s
1348	F	1	0	2009	2000s
848	M	1	0.0712329	2010	2010s
849	M	1	0	2010	2010s
850	F	1	0	2010	2010s
851	F	1	5.12877	2010	2010s
852	M	0	13.7836	2010	2010s
853	M	1	4.31507	2010	2010s
854	M	0	13.611	2010	2010s
855	F	1	0.00821918	2010	2010s
856	M	1	11.5644	2010	2010s
857	F	0	13.4219	2010	2010s
858	F	1	0.00821918	2010	2010s
859	M	0	13.1151	2010	2010s
860	M	1	0.136986	2010	2010s
863	F	0	13.663	2010	2010s
1349	M	0	13.9534	2010	2010s
1490	F	0	13.9616	2010	2010s
865	F	0	12.8137	2011	2010s
866	F	1	1.19452	2011	2010s
867	F	1	0.0219178	2011	2010s
869	M	1	0.726027	2011	2010s
870	M	0	12.5151	2011	2010s
871	M	1	0	2011	2010s
872	F	0	12.4356	2011	2010s
873	F	0	12.411	2011	2010s
874	M	0	12.3808	2011	2010s
875	M	1	0	2011	2010s
876	M	1	7.4137	2011	2010s
877	M	1	0.00547945	2011	2010s
878	M	0	12.0932	2011	2010s
880	F	0	12.0192	2011	2010s
907	F	0	12.0192	2011	2010s
1351	M	1	2.17808	2011	2010s
882	F	1	0	2012	2010s
883	M	0	11.9041	2012	2010s
884	M	0	11.8027	2012	2010s
885	F	0	11.7699	2012	2010s
886	F	1	5.19178	2012	2010s
887	M	0	11.6055	2012	2010s
888	M	1	0.0136986	2012	2010s
889	M	0	11.5753	2012	2010s
890	F	1	10.6219	2012	2010s
891	M	0	11.2767	2012	2010s
892	M	1	1.43562	2012	2010s
893	M	0	11.1753	2012	2010s
894	M	0	11.1397	2012	2010s
909	F	0	11.6904	2012	2010s
910	M	0	11.4247	2012	2010s
923	F	0	11.5068	2012	2010s
925	M	1	3.73425	2012	2010s
1352	F	0	11.5644	2012	2010s
895	F	0	10.9945	2013	2010s
896	M	1	0.0986301	2013	2010s
897	F	1	0.00547945	2013	2010s
898	M	0	10.6356	2013	2010s
899	F	0	10.6274	2013	2010s
900	M	0	10.6164	2013	2010s
901	F	0	10.5507	2013	2010s
902	F	1	0	2013	2010s
903	M	0	10.3699	2013	2010s
904	M	0	10.2438	2013	2010s
905	F	1	1.46027	2013	2010s
906	F	0	10.1918	2013	2010s
924	F	0	10.0877	2013	2010s
926	F	0	10.4575	2013	2010s
927	M	1	1.96438	2013	2010s
912	M	1	2.91781	2014	2010s
913	F	1	0	2014	2010s
914	F	0	9.80822	2014	2010s
915	F	1	0.0547945	2014	2010s
916	M	1	0	2014	2010s
917	F	0	9.6274	2014	2010s
918	M	1	7.49041	2014	2010s
919	M	0	9.28219	2014	2010s
920	M	0	9.25753	2014	2010s
921	F	0	9.21918	2014	2010s
922	M	0	9.02466	2014	2010s
928	F	1	4.87397	2014	2010s
929	F	1	7.10685	2014	2010s
930	M	0	9.00822	2014	2010s
955	F	0	9.81096	2014	2010s
1000	M	1	2.68493	2014	2010s
1007	F	1	2.25753	2014	2010s
931	M	1	0.00821918	2015	2010s
932	M	0	8.80274	2015	2010s
933	F	0	8.77808	2015	2010s
934	M	0	8.69315	2015	2010s
935	F	0	8.69041	2015	2010s
936	M	0	8.59452	2015	2010s
937	M	0	8.57534	2015	2010s
938	F	0	8.54521	2015	2010s
939	F	0	8.52603	2015	2010s
940	F	0	8.46575	2015	2010s
941	F	1	0.00547945	2015	2010s
942	M	1	5.75342	2015	2010s
943	M	0	8.43014	2015	2010s
944	M	0	8.40822	2015	2010s
945	F	1	4.70685	2015	2010s
946	M	1	1.01918	2015	2010s
947	M	0	8.32055	2015	2010s
948	M	0	8.29315	2015	2010s
949	M	0	8.29041	2015	2010s
950	M	1	0.0246575	2015	2010s
952	F	0	8.13151	2015	2010s
953	F	1	0	2015	2010s
956	F	0	8.4411	2015	2010s
957	M	1	3.12877	2016	2010s
958	F	0	7.77808	2016	2010s
959	F	0	7.73151	2016	2010s
960	F	1	0	2016	2010s
961	M	1	2.15616	2016	2010s
962	M	1	4.48219	2016	2010s
963	M	0	7.48493	2016	2010s
964	M	0	7.4274	2016	2010s
965	M	1	2.24932	2016	2010s
966	M	0	7.30959	2016	2010s
967	F	1	0	2016	2010s
968	M	1	0.00547945	2016	2010s
969	M	1	0	2016	2010s
970	F	0	7.60548	2016	2010s
990	F	0	7.11781	2016	2010s
1353	M	0	7.93151	2016	2010s
1354	M	0	7.31507	2016	2010s
1355	M	0	7.31507	2016	2010s
971	F	1	0.00821918	2017	2010s
972	F	0	6.91781	2017	2010s
973	M	0	6.83288	2017	2010s
974	F	0	6.76712	2017	2010s
975	M	0	6.76164	2017	2010s
976	M	0	6.73973	2017	2010s
977	F	1	0.00273973	2017	2010s
978	F	0	6.58904	2017	2010s
979	M	0	6.5726	2017	2010s
980	F	0	6.49315	2017	2010s
981	M	0	6.44932	2017	2010s
982	M	1	5.23014	2017	2010s
983	F	1	0	2017	2010s
984	F	0	6.41096	2017	2010s
985	F	1	2	2017	2010s
986	F	1	0.0712329	2017	2010s
987	M	0	6.18904	2017	2010s
988	F	0	6.09863	2017	2010s
989	M	0	6.01918	2017	2010s
991	M	0	6.67945	2017	2010s
992	F	0	6.64658	2017	2010s
1024	F	0	6.50959	2017	2010s
1025	M	0	6.54521	2017	2010s
1026	F	0	6.66301	2017	2010s
993	M	0	5.72329	2018	2010s
994	M	0	5.70411	2018	2010s
995	M	1	0.00273973	2018	2010s
996	F	0	5.55068	2018	2010s
997	F	0	5.52055	2018	2010s
998	M	0	5.48493	2018	2010s
999	F	0	5.47397	2018	2010s
1001	M	1	4.03836	2018	2010s
1002	M	1	1.06575	2018	2010s
1003	F	1	0	2018	2010s
1004	M	1	0.958904	2018	2010s
1005	F	0	5.06301	2018	2010s
1023	M	0	5.44932	2018	2010s
1006	M	0	4.89589	2019	2010s
1008	M	1	0	2019	2010s
1009	F	0	4.64384	2019	2010s
1010	M	0	4.61918	2019	2010s
1011	F	0	4.60274	2019	2010s
1012	M	0	4.5589	2019	2010s
1013	F	1	0.0109589	2019	2010s
1014	M	0	4.53699	2019	2010s
1015	F	0	4.50411	2019	2010s
1016	M	0	4.50137	2019	2010s
1017	M	0	4.48493	2019	2010s
1018	F	0	4.47945	2019	2010s
1019	F	1	0	2019	2010s
1020	F	1	2.58904	2019	2010s
1021	M	0	4.08767	2019	2010s
1022	F	0	4.04932	2019	2010s
1356	M	0	4.72877	2019	2010s
1027	F	0	3.95616	2020	2020s
1028	F	0	3.91233	2020	2020s
1029	M	0	3.90411	2020	2020s
1030	M	0	3.87123	2020	2020s
1031	F	0	3.81918	2020	2020s
1032	F	1	0.0191781	2020	2020s
1033	F	0	3.72877	2020	2020s
1034	M	1	0	2020	2020s
1035	M	0	3.63562	2020	2020s
1036	F	0	3.5589	2020	2020s
1037	M	0	3.54521	2020	2020s
1038	M	0	3.46575	2020	2020s
1039	F	1	1.73151	2020	2020s
1040	M	1	0	2020	2020s
1041	M	1	2.32877	2020	2020s
1042	F	0	3.25205	2020	2020s
1043	F	1	0	2020	2020s
1044	M	1	3.07397	2020	2020s
1045	M	0	3.21644	2020	2020s
1046	M	1	2.05479	2020	2020s
1047	F	0	3.19726	2020	2020s
1048	F	0	3.10137	2020	2020s
1049	F	0	3.09863	2020	2020s
1050	M	0	3.00822	2020	2020s
1357	F	0	3.41644	2020	2020s
1051	F	0	2.94521	2021	2020s
1052	M	0	2.88767	2021	2020s
1053	M	1	0.947945	2021	2020s
1054	F	1	1.25479	2021	2020s
1055	F	0	2.6411	2021	2020s
1056	F	0	2.61644	2021	2020s
1057	M	0	2.59452	2021	2020s
1058	M	0	2.59452	2021	2020s
1059	M	0	2.55616	2021	2020s
1060	F	0	2.54247	2021	2020s
1061	F	0	2.49589	2021	2020s
1062	M	0	2.48219	2021	2020s
1063	M	0	2.26849	2021	2020s
1064	M	0	2.24384	2021	2020s
1065	F	0	2.13425	2021	2020s
1066	F	1	0.30411	2022	2020s
1067	M	0	1.91507	2022	2020s
1068	F	0	1.80548	2022	2020s
1069	M	0	1.77808	2022	2020s
1070	M	0	1.75342	2022	2020s
1071	M	0	1.74795	2022	2020s
1072	M	0	1.71781	2022	2020s
1073	M	1	0.0164384	2022	2020s
1074	M	0	1.63288	2022	2020s
1075	M	0	1.5589	2022	2020s
1076	F	0	1.53699	2022	2020s
1077	F	0	1.52877	2022	2020s
1078	F	0	1.51781	2022	2020s
1079	F	0	1.41644	2022	2020s
1080	M	0	1.40548	2022	2020s
1081	M	0	1.38356	2022	2020s
1082	M	0	1.36712	2022	2020s
1083	F	1	1.06849	2022	2020s
1084	F	0	1.30137	2022	2020s
1358	M	0	1.74521	2022	2020s
1491	F	0	0.906849	2023	2020s
1492	M	0	0.79726	2023	2020s
1493	M	1	0.00273973	2023	2020s
1494	M	0	0.350685	2023	2020s
1495	F	0	0.578082	2023	2020s
1496	M	1	0.0109589	2023	2020s
1497	F	0	0.172603	2023	2020s
1498	M	0	0.50137	2023	2020s
1499	F	0	0.49589	2023	2020s
1500	F	0	0.030137	2023	2020s
1501	M	0	0.40274	2023	2020s
